# Supplementary material
Source: publisher figshare collection journal article supplement (https://springernature.figshare.com/ndownloader/files/14074022)
Supplement: Supplementary file [file 14074022]

## Additional file 6

a

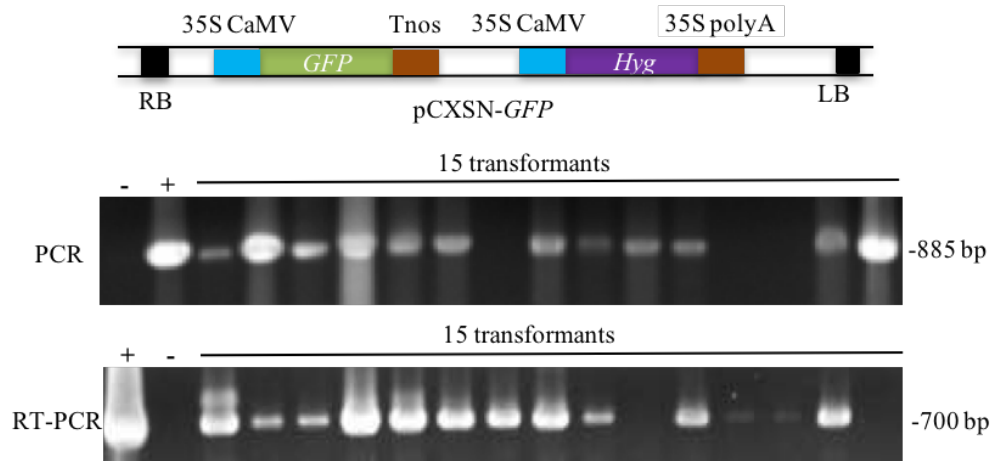

b

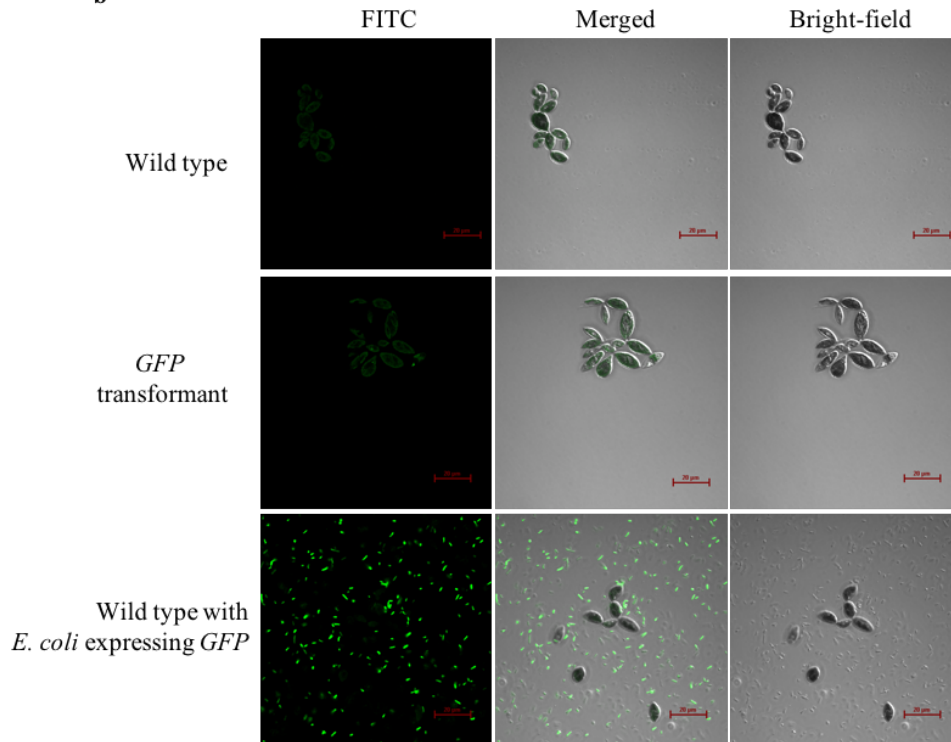

Additional file 6. *Agrobacterium*-mediated transformation of *S. acutus* TISTR8447. a. The expression construct based on pCXSN harboring *GFP* reporter. PCR analysis of 15 independent transformants for the *aphIV* transgene, and RT-PCR analysis of other 15 independent transformants for *aphIV* transcript. (-) indicates DNA or cDNA of wild type controls, and (+) indicates transformation plasmid. b. Confocal microscopy for GFP signals of TISTR8447 and *GFP* transformants. For the lowest panel, *E. coli* expressing *GFP* and TISTR8447 was mixed before the observation.
